# Supplementary material for: Race-based differences in serum biomarkers for cancer-associated cachexia in a diverse cohort of patients with pancreatic ductal adenocarcinoma
Source: Research Square preprint supplement (doi:10.21203/rs.3.rs-5690506/v1), 2025-02-10
Supplement: Supplementary file 1 [file 2b0d2dea08b016ae318c2d5a.xlsx]

## Sheet: Sheet1
Table S3: Sociodemographic and clinical characteristics of FPC participants with baseline blood collected, stratified by race and ethnicity (n=206)
		NHW (n=136)	NHW %	NHB (n=30)	NHB %	H/L (n=40)	H/L %	p-value (univariate)
Age at diagnosis, mean (SD)		70.5 (9.1)		66.6 (10.8)		65.4 (13.6)		0.06618
Sex	Female	66	48.5294	19	63.3333	26	65	0.09846
	Male	70	51.4706	11	36.6667	14	35
Cachexia status^	non cachexia	57	41.9118	11	36.6667	13	32.5	0.4424
	cachexia	75	55.1471	19	63.3333	27	67.5
	Missing	4	2.94118	0	0	0	0
Education	Post-graduate	23	16.9118	2	6.66667	4	10	0.7287
	Up to college	46	33.8235	8	26.6667	6	15
	Up to high school	29	21.3235	6	20	7	17.5
	Missing	38	27.9412	14	46.6667	23	57.5
Income	$0-$60,000	35	25.7353	10	33.3333	7	17.5	0.1378
	$60,000-$100,000	23	16.9118	3	10	3	7.5
	Over $100,000	20	14.7059	1	3.33333	0	0
	Missing	58	42.6471	16	53.3333	30	75
Insurance status	Insured	90	66.1765	15	50	18	45	0.0233
	Uninsured	1	0.735294	0	0	1	2.5
	Missing	45	33.0882	15	50	21	52.5
Marital Status	Married	68	50	8	26.6667	13	32.5	<0.001
	Unmarried	25	18.3824	8	26.6667	6	15
	Missing	43	31.6176	14	46.6667	21	52.5
Stage	I/II	69	50.7353	8	26.6667	18	45	0.03917
	III/IV	40	29.4118	15	50	15	37.5
	Missing	27	19.8529	7	23.3333	7	17.5
Grade	1 (well-differentiated)	3	2.20588	0	0	2	5	0.323
	2 (moderately differentiated)	44	32.3529	6	20	9	22.5
	3 (poorly differentiated)	21	15.4412	4	13.3333	8	20
	4 (undifferentiated)	0	0	0	0	0	0
	Missing	68	50	20	66.6667	21	52.5
BMI Category	Underweight	10	7.35294	3	10	8	20	0.05354
	Normal	42	30.8824	7	23.3333	15	37.5
	Overweight	47	34.5588	14	46.6667	12	30
	Obese	35	25.7353	6	20	3	7.5
	Missing	2	1.47059	0	0	2	5
BMI, mean (SD)		27.0 (5.3)		27.3 (5.6)		24.3 (4.8)		0.0179
Family history of pancreatic cancer	No / Unknown	127	93.3824	30	100	38	95	0.01718
	Yes	9	6.61765	0	0	2	5
Smoking status	Never	40	29.4118	10	33.3333	18	45	0.02598
	Former	51	37.5	7	23.3333	6	15
	Current	11	8.08824	2	6.66667	0	0
	Missing	34	25	11	36.6667	16	40
ACCI	0-5	13	9.55882	8	26.6667	10	25	<0.001
	>5	57	41.9118	11	36.6667	16	40
	Missing	66	48.5294	11	36.6667	14	35
Diabetes	Yes	43	31.6176	9	30	16	40	0.002674
	No	50	36.7647	20	66.6667	18	45
	Missing	43	31.6176	1	3.33333	6	15
ECOG functional score	0	66	48.5294	10	33.3333	16	40	0.174
	1	60	44.1176	20	66.6667	16	40
	2	6	4.41176	0	0	1	2.5
	3 or 4	1	0.735294	0	0	2	5
	Missing	3	2.20588	0	0	5	12.5
% Weight loss, median (SD)		6.18 (6.8)		8.4 (6.5)		8.1 (7.6)		0.287
Waist circumference, median (SD)		38.2 (13.8)		36.0 (12.9)		35.0 (5.5)		0.048
Waist-Hip Ratio, median (SD)		0.93 (0.1)		0.92 (0.07)		090 (0.09)		0.145
Survival, months, median (LCI;UCI)		431 (377;508)		383 (314;497)		684 (504;NA)		0.021
Abbreviations: BMI=Body Mass Index; Ca=Cachectic; ACCI= Adjusted Charlson Comorbidity Index; NCa=Non-cachectic; LCI=Lower confidence interval; UCI=Upper confidence interval; SD=standard deviation
NHB = Non-Hispanic Black; H/L = Hispanic/Latinx; NHW = Non-Hispanic White; circ = circumference; ECOG = Eastern Cooperative Oncology Group
^Cachexia staging according to Fearon et al (40) with the following modification: skeletal mass index (SMI) was not assessed
