# Supplementary material for: Race-based differences in serum biomarkers for cancer-associated cachexia in a diverse cohort of patients with pancreatic ductal adenocarcinoma
Source: Research Square preprint supplement (doi:10.21203/rs.3.rs-5690506/v1), 2025-02-10
Supplement: Supplementary file 3 [file c5de8321a806d9b34a329e38.xlsx]

## Sheet: Sheet1
Table S11: Univariate coxph for all significant biomarkers
Analyte	p-value
ENA-78	N/S
GRO-a	0.0353
CRP	1.53e-07
TNF-alpha	0.0243
GDF-15	6.83e-06
HbA1c	N/S
HGF	0.000601
IFN-gamma	N/S
IL-10	0.00388
IL-1B	N/S
IL-22	N/S
IL-6	9.96e-05
IL-8	0.00675
Leptin	N/S
MIP-1a	N/S
MIP-3a	N/S
TIMP1	4.33e-06
