# Supplementary material for: Race-based differences in serum biomarkers for cancer-associated cachexia in a diverse cohort of patients with pancreatic ductal adenocarcinoma
Source: Research Square preprint supplement (doi:10.21203/rs.3.rs-5690506/v1), 2025-02-10
Supplement: Supplementary file 4 [file d4e8dc1a4109f1cf62af2ad6.xlsx]

## Sheet: Table S1
Table S1. Serum biomarkers examined in the Florida Pancreas Colaborative PDAC Cohort, sorted alphabetically
Analyte	Platform/Vendor	Success^	% in range
ActivinA	ELISA: RayBiotech	Yes	70.3883
Activin RIIB	ELISA: RayBiotech	No	36.8932
Albumin	MSD Multiplex Assay (R-plex)	Yes	100
α-SMA	ELISA: Novus	Yes	99.0291
Adiponectin	MSD Multiplex Assay (R-plex)	Yes	83.0097
Angiotensin II	ELISA: RayBiotech	Yes	70.8738
CA 19-9	ELISA: Abcam	Yes	99.0291
Cholecystokinin	ELISA: RayBiotech	Yes	90.2913
Cotinine	ELISA: Abnova	No	12.6214
C-peptide	MSD Multiplex Assay (U-plex)	Yes	99.0291
CRP	MSD Multiplex Assay (R-plex)	Yes	100
CXCL1/GRO-α	MSD Multiplex Assay (U-plex)	Yes	100
CXCL5/ENA-78	MSD Multiplex Assay (U-plex)	Yes	100
Fibronectin	MSD Multiplex Assay (R-plex)	Yes	80.5825
G-CSF	MSD Multiplex Assay (U-plex)	Yes	100
GDF-15/MIC-1	MSD Multiplex Assay (R-plex)	Yes	100
Glucose	ELISA: Cayman Chemical	Yes	96.6019
Glycohemoglobin (HbA1c)	ELISA: Biomatik	Yes	100
HDL	ELISA: Novus	Yes	100
HGF	MSD Multiplex Assay (R-plex)	Yes	100
HIF-1a	ELISA: Biomatik	Yes	92.7184
IFN-γ	MSD Multiplex Assay (U-plex)	Yes	100
IGF-1	MSD Multiplex Assay (R-plex)	No	16.5049
IL-1α	MSD Multiplex Assay (U-plex)	No	19.9029
IL-1β	MSD Multiplex Assay (U-plex)	Yes	63.1068
IL-6	MSD Multiplex Assay (U-plex)	Yes	100
IL-8	MSD Multiplex Assay (U-plex)	Yes	100
IL-10	MSD Multiplex Assay (U-plex)	Yes	99.5146
IL-22	MSD Multiplex Assay (U-plex)	Yes	95.6311
Insulin	MSD Multiplex Assay (U-plex)	Yes	98.0583
Laminin	ELISA: Abcam	Yes	100
LDL	ELISA: Novus	Yes	100
Leptin	MSD Multiplex Assay (U-plex)	Yes	98.0583
Lumican	Custom MSD Assay	Yes	100
MCP-1	MSD Multiplex Assay (U-plex)	Yes	100
MDC	MSD Multiplex Assay	Yes	100
MIP-1α	MSD Multiplex Assay (U-plex)	Yes	96.6019
MIP-3α	MSD Multiplex Assay	Yes	93.2039
MMP-2	MSD Multiplex Assay (R-plex)	Yes	99.0291
MMP-14/MT1-MMP	Custom MSD Assay	No	11.165
PPAR-G	ELISA: Biomatik	Yes	99.5146
TGFß1	MSD Multiplex Assay (U-plex)	Yes	100
TGFß2	MSD Multiplex Assay (U-plex)	Yes	87.8641
TGFß3	MSD Multiplex Assay (U-plex)	No	18.4466
TIMP-1	MSD Multiplex Assay (R-plex)	Yes	100
TNF-α	MSD Multiplex Assay (U-plex)	Yes	100
Triglycerides	ELISA: Abcam	Yes	89.3204
UCP1	ELISA: Biomatik	No	0
ZAG	Custom MSD Assay	Yes	100
Abbreviations: MSD=Meso Scale Discovery ; ELISA=Enzyme-linked immunoabsorbant assay
^Assay success is defined as having in-range detectable values for 60-100% of tested participants and is denoted by a "Yes" in this column.
^ Lack of assay success due to fewer than 60% of samples having values within the detectable range is denoted with a "No" in this column.
